# Supplementary material
Source: HighWire-hosted journal article supplement (https://mcr.aacrjournals.org/content/suppl/2021/08/12/1541-7786.MCR-21-0060)
Supplement: 259471_3_supp_7276983_qwnzbs.pdf [file 259471_3_supp_7276983_qwnzbs.pdf]

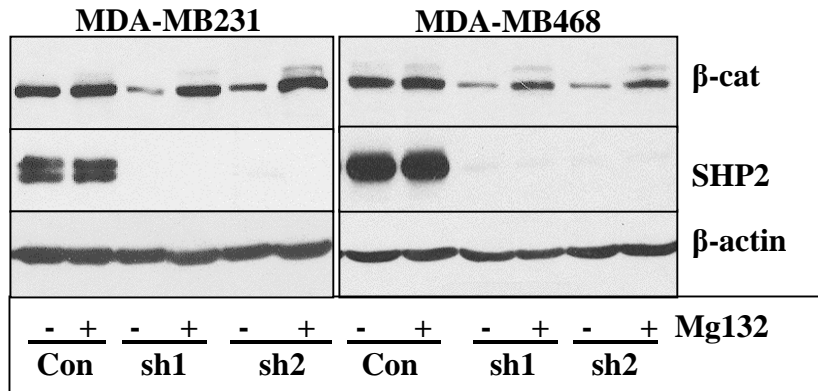

**Supplementary Figure 2:** The control (Con) and the SHP2-silenced cells (sh1 and sh2) were treated with 5  $\mu$ g/ml Mg132 for 3 hours. Lysates prepared from these cells were analyzed for  $\beta$ -catenin, SHP2, and  $\beta$ -actin. As shown, Mg132 treatment restored  $\beta$ -catenin levels.
